# Supplementary material for: Non invasive imaging assessment of the biodistribution of GSK2849330, an ADCC and CDC optimized anti HER3 mAb, and its role in tumor macrophage recruitment in human tumor-bearing mice
Source: PubMed Central journal article supplement (PMC5407619; doi:10.1371/journal.pone.0176075), 2017-04-27
Supplement: pone.0176075.s001.pdf [file pone.0176075.s001.pdf]

S1 Table

| <b>Fig 2A data: Tumor uptake (%ID/g), n = 5 per group</b>           |                                                                                   |            |                                                                        |            |                                                                                                    |            |
|---------------------------------------------------------------------|-----------------------------------------------------------------------------------|------------|------------------------------------------------------------------------|------------|----------------------------------------------------------------------------------------------------|------------|
| <b>Hours post<br/><sup>89</sup>Zr-<br/>GSK2849330<br/>injection</b> | <b>Group 1 (MIA-<br/>PaCa-2): <sup>89</sup>Zr-<br/>GSK2849330 (0.5<br/>mg/kg)</b> |            | <b>Group 2 (CHL-1):<br/><sup>89</sup>Zr-GSK2849330<br/>(0.5 mg/kg)</b> |            | <b>Group 3 (CHL-1):<br/>GSK2849330 (50 mg/kg) +<br/><sup>89</sup>Zr-GSK2849330 (0.5<br/>mg/kg)</b> |            |
|                                                                     | <b>Mean</b>                                                                       | <b>SEM</b> | <b>Mean</b>                                                            | <b>SEM</b> | <b>Mean</b>                                                                                        | <b>SEM</b> |
| <b>24</b>                                                           | 4.08                                                                              | 0.39       | 3.68                                                                   | 0.54       | 4.40                                                                                               | 0.20       |
| <b>48</b>                                                           | 3.08                                                                              | 0.21       | 3.52                                                                   | 0.37       | 4.72                                                                                               | 0.25       |
| <b>72</b>                                                           | 2.42                                                                              | 0.12       | 3.26                                                                   | 0.46       | 5.02                                                                                               | 0.24       |
| <b>144</b>                                                          | 1.70                                                                              | 0.11       | 2.54                                                                   | 0.37       | 5.18                                                                                               | 0.20       |

| <b>Fig 2B data: Blood uptake (%ID/g) , n = 5 per group</b>          |                                                                                   |            |                                                                        |            |                                                                                                    |            |
|---------------------------------------------------------------------|-----------------------------------------------------------------------------------|------------|------------------------------------------------------------------------|------------|----------------------------------------------------------------------------------------------------|------------|
| <b>Hours post<br/><sup>89</sup>Zr-<br/>GSK2849330<br/>injection</b> | <b>Group 1 (MIA-<br/>PaCa-2): <sup>89</sup>Zr-<br/>GSK2849330 (0.5<br/>mg/kg)</b> |            | <b>Group 2 (CHL-1):<br/><sup>89</sup>Zr-GSK2849330<br/>(0.5 mg/kg)</b> |            | <b>Group 3 (CHL-1):<br/>GSK2849330 (50 mg/kg) +<br/><sup>89</sup>Zr-GSK2849330 (0.5<br/>mg/kg)</b> |            |
|                                                                     | <b>Mean</b>                                                                       | <b>SEM</b> | <b>Mean</b>                                                            | <b>SEM</b> | <b>Mean</b>                                                                                        | <b>SEM</b> |
| <b>24</b>                                                           | 2.73                                                                              | 0.17       | 2.60                                                                   | 0.28       | 8.40                                                                                               | 0.41       |
| <b>48</b>                                                           | 0.94                                                                              | 0.10       | 1.06                                                                   | 0.13       | 6.26                                                                                               | 0.25       |
| <b>72</b>                                                           | 0.89                                                                              | 0.08       | 1.05                                                                   | 0.07       | 4.88                                                                                               | 0.22       |
| <b>144</b>                                                          | 0.75                                                                              | 0.08       | 0.66                                                                   | 0.10       | 2.92                                                                                               | 0.19       |

| <b>Fig 2C data: Tumor to blood ratio, n = 5 per group</b>           |                                                                                   |            |                                                                        |            |                                                                                                    |            |
|---------------------------------------------------------------------|-----------------------------------------------------------------------------------|------------|------------------------------------------------------------------------|------------|----------------------------------------------------------------------------------------------------|------------|
| <b>Hours post<br/><sup>89</sup>Zr-<br/>GSK2849330<br/>injection</b> | <b>Group 1 (MIA-<br/>PaCa-2): <sup>89</sup>Zr-<br/>GSK2849330 (0.5<br/>mg/kg)</b> |            | <b>Group 2 (CHL-1):<br/><sup>89</sup>Zr-GSK2849330<br/>(0.5 mg/kg)</b> |            | <b>Group 3 (CHL-1):<br/>GSK2849330 (50 mg/kg) +<br/><sup>89</sup>Zr-GSK2849330 (0.5<br/>mg/kg)</b> |            |
|                                                                     | <b>Mean</b>                                                                       | <b>SEM</b> | <b>Mean</b>                                                            | <b>SEM</b> | <b>Mean</b>                                                                                        | <b>SEM</b> |
| <b>24</b>                                                           | 1.64                                                                              | 0.05       | 1.45                                                                   | 0.23       | 0.53                                                                                               | 0.05       |
| <b>48</b>                                                           | 3.48                                                                              | 0.52       | 3.62                                                                   | 0.69       | 0.76                                                                                               | 0.07       |
| <b>72</b>                                                           | 2.79                                                                              | 0.19       | 3.08                                                                   | 0.36       | 1.04                                                                                               | 0.09       |
| <b>144</b>                                                          | 2.31                                                                              | 0.15       | 4.07                                                                   | 0.72       | 1.80                                                                                               | 0.12       |
