# Supplementary material for: Non invasive imaging assessment of the biodistribution of GSK2849330, an ADCC and CDC optimized anti HER3 mAb, and its role in tumor macrophage recruitment in human tumor-bearing mice
Source: PubMed Central journal article supplement (PMC5407619; doi:10.1371/journal.pone.0176075), 2017-04-27
Supplement: pone.0176075.s002.pdf [file pone.0176075.s002.pdf]

S2 Table

| Fig 3A & 3B data: Dose escalation study of <sup>89</sup> Zr-GSK2849330 (%ID/g), n = 4 per group |                      |      |                        |      |                      |      |                      |      |                       |      |
|-------------------------------------------------------------------------------------------------|----------------------|------|------------------------|------|----------------------|------|----------------------|------|-----------------------|------|
|                                                                                                 | GSK2849330 (0 mg/kg) |      | GSK2849330 (0.3 mg/kg) |      | GSK2849330 (1 mg/kg) |      | GSK2849330 (3 mg/kg) |      | GSK2849330 (10 mg/kg) |      |
|                                                                                                 | Mean                 | SEM  | Mean                   | SEM  | Mean                 | SEM  | Mean                 | SEM  | Mean                  | SEM  |
| <b>Blood</b>                                                                                    | 0.46                 | 0.03 | 0.57                   | 0.04 | 1.05                 | 0.09 | 2.28                 | 0.25 | 8.43                  | 0.61 |
| <b>Lung</b>                                                                                     | 1.04                 | 0.10 | 1.85                   | 0.17 | 2.71                 | 0.22 | 3.30                 | 0.37 | 6.65                  | 0.62 |
| <b>Heart</b>                                                                                    | 1.01                 | 0.01 | 0.90                   | 0.10 | 1.22                 | 0.10 | 1.59                 | 0.18 | 3.76                  | 0.24 |
| <b>Pancreas</b>                                                                                 | 0.48                 | 0.03 | 0.85                   | 0.34 | 1.36                 | 0.16 | 1.35                 | 0.14 | 1.77                  | 0.14 |
| <b>Tumor</b>                                                                                    | 1.86                 | 0.16 | 4.08                   | 0.59 | 7.97                 | 0.58 | 11.41                | 1.00 | 12.66                 | 1.05 |
| <b>Skin</b>                                                                                     | 0.46                 | 0.07 | 0.72                   | 0.07 | 1.12                 | 0.13 | 1.68                 | 0.11 | 2.00                  | 0.15 |
| <b>Muscle</b>                                                                                   | 0.33                 | 0.04 | 0.56                   | 0.06 | 0.53                 | 0.04 | 0.83                 | 0.11 | 1.42                  | 0.11 |
| <b>GI</b>                                                                                       | 0.95                 | 0.18 | 2.26                   | 0.14 | 3.99                 | 0.21 | 4.10                 | 0.17 | 2.39                  | 0.09 |
| <b>Urine</b>                                                                                    | 0.29                 | 0.09 | 0.26                   | 0.11 | 0.17                 | 0.02 | 0.25                 | 0.06 | 0.34                  | 0.04 |
| <b>Femur</b>                                                                                    | 3.69                 | 0.28 | 4.22                   | 0.50 | 6.78                 | 1.71 | 5.16                 | 0.36 | 4.22                  | 0.33 |
| <b>Brain</b>                                                                                    | 0.10                 | 0.03 | 0.08                   | 0.00 | 0.11                 | 0.00 | 0.39                 | 0.24 | 0.29                  | 0.02 |
| <b>Stomach</b>                                                                                  | 0.42                 | 0.07 | 0.77                   | 0.05 | 1.65                 | 0.17 | 1.32                 | 0.38 | 1.52                  | 0.20 |
| <b>Thyroid</b>                                                                                  | 0.90                 | 0.09 | 2.42                   | 0.55 | 3.63                 | 0.27 | 4.23                 | 0.08 | 3.65                  | 0.35 |
| <b>Liver</b>                                                                                    | 27.77                | 1.85 | 15.17                  | 1.05 | 12.64                | 1.17 | 10.30                | 0.63 | 8.96                  | 0.35 |
| <b>Kidneys</b>                                                                                  | 10.96                | 1.33 | 9.29                   | 0.94 | 12.04                | 0.74 | 11.26                | 0.85 | 12.67                 | 1.20 |
| <b>Spleen</b>                                                                                   | 7.79                 | 1.08 | 10.38                  | 2.31 | 14.69                | 1.11 | 16.38                | 2.83 | 17.99                 | 3.10 |

| Fig 3C & 3D data: Dose escalation study of <sup>89</sup> Zr-GSK2849330, n = 4 per group |                      |      |                        |      |                      |      |                      |      |                       |      |
|-----------------------------------------------------------------------------------------|----------------------|------|------------------------|------|----------------------|------|----------------------|------|-----------------------|------|
|                                                                                         | GSK2849330 (0 mg/kg) |      | GSK2849330 (0.3 mg/kg) |      | GSK2849330 (1 mg/kg) |      | GSK2849330 (3 mg/kg) |      | GSK2849330 (10 mg/kg) |      |
|                                                                                         | Mean                 | SEM  | Mean                   | SEM  | Mean                 | SEM  | Mean                 | SEM  | Mean                  | SEM  |
| <b>Liver/Blood</b>                                                                      | 60.46                | 4.12 | 27.22                  | 3.19 | 12.22                | 1.19 | 4.64                 | 0.43 | 1.07                  | 0.03 |
| <b>Tumor/Blood</b>                                                                      | 4.07                 | 0.44 | 7.31                   | 1.30 | 7.89                 | 1.22 | 5.15                 | 0.62 | 1.50                  | 0.04 |
