# Supplementary material for: Non invasive imaging assessment of the biodistribution of GSK2849330, an ADCC and CDC optimized anti HER3 mAb, and its role in tumor macrophage recruitment in human tumor-bearing mice
Source: PubMed Central journal article supplement (PMC5407619; doi:10.1371/journal.pone.0176075), 2017-04-27
Supplement: pone.0176075.s003.pdf [file pone.0176075.s003.pdf]

S3 Table

| <b>Fig 4 data: Tumor optical intensity (P/sec/mm<sup>2</sup>), n = 4 per group</b> |                                                                                                 |            |                                                       |            |                                                       |            |                                                         |            |
|------------------------------------------------------------------------------------|-------------------------------------------------------------------------------------------------|------------|-------------------------------------------------------|------------|-------------------------------------------------------|------------|---------------------------------------------------------|------------|
| <b>Hours post <sup>89</sup>Zr-<br/>GSK2849330<br/>injection</b>                    | <b>Group 1: Blocking:<br/>GSK2849330 (50 mg/kg) +<br/>VivoTag 680-<br/>GSK2849330 (5 mg/kg)</b> |            | <b>Group 2: VivoTag 680-<br/>GSK2849330 (5 mg/kg)</b> |            | <b>Group 3: VivoTag 680-<br/>GSK2849330 (1 mg/kg)</b> |            | <b>Group 4: VivoTag 680-<br/>GSK2849330 (0.5 mg/kg)</b> |            |
|                                                                                    | <b>Mean</b>                                                                                     | <b>SEM</b> | <b>Mean</b>                                           | <b>SEM</b> | <b>Mean</b>                                           | <b>SEM</b> | <b>Mean</b>                                             | <b>SEM</b> |
| <b>48</b>                                                                          | 3.04E+08                                                                                        | 2.60E+07   | 2.50E+08                                              | 2.93E+07   | 3.51E+07                                              | 6.34E+06   | 2.08E+07                                                | 1.07E+06   |
| <b>72</b>                                                                          | 2.30E+08                                                                                        | 2.20E+07   | 2.50E+08                                              | 2.22E+07   | 2.52E+07                                              | 5.16E+06   | 1.84E+07                                                | 1.73E+06   |
| <b>96</b>                                                                          | 1.85E+08                                                                                        | 2.65E+07   | 2.69E+08                                              | 2.39E+07   | 2.84E+07                                              | 4.59E+06   | 1.70E+07                                                | 1.66E+06   |
