# Supplementary material for: Non invasive imaging assessment of the biodistribution of GSK2849330, an ADCC and CDC optimized anti HER3 mAb, and its role in tumor macrophage recruitment in human tumor-bearing mice
Source: PubMed Central journal article supplement (PMC5407619; doi:10.1371/journal.pone.0176075), 2017-04-27
Supplement: pone.0176075.s004.pdf [file pone.0176075.s004.pdf]

S4 Table

| <b>Fig 6A data: Body weight (g), n = 10 per group</b> |               |      |                          |      |
|-------------------------------------------------------|---------------|------|--------------------------|------|
| Days post treatment                                   | Vehicle group |      | GSK2849330 treated group |      |
|                                                       | Mean          | SEM  | Mean                     | SEM  |
| <b>0</b>                                              | 20.22         | 0.26 | 20.40                    | 0.26 |
| <b>2</b>                                              | 20.36         | 0.25 | 20.59                    | 0.25 |
| <b>4</b>                                              | 21.34         | 0.20 | 20.99                    | 0.32 |
| <b>9</b>                                              | 20.75         | 0.26 | 21.00                    | 0.29 |
| <b>11</b>                                             | 20.86         | 0.30 | 20.68                    | 0.29 |
| <b>14</b>                                             | 20.70         | 0.18 | 20.94                    | 0.32 |
| <b>16</b>                                             | 20.97         | 0.32 | 21.20                    | 0.30 |

| <b>Fig 6B data: Tumor size (mm<sup>3</sup>), n = 10 per group</b> |               |       |                          |       |
|-------------------------------------------------------------------|---------------|-------|--------------------------|-------|
| Days post treatment                                               | Vehicle group |       | GSK2849330 treated group |       |
|                                                                   | Mean          | SEM   | Mean                     | SEM   |
| <b>0</b>                                                          | 202.27        | 13.45 | 221.03                   | 16.12 |
| <b>2</b>                                                          | 248.26        | 9.82  | 222.04                   | 21.98 |
| <b>4</b>                                                          | 373.74        | 19.84 | 223.19                   | 19.76 |
| <b>9</b>                                                          | 463.32        | 32.42 | 299.97                   | 21.93 |
| <b>11</b>                                                         | 539.39        | 39.18 | 309.89                   | 13.08 |
| <b>14</b>                                                         | 615.13        | 39.73 | 373.66                   | 15.89 |
| <b>16</b>                                                         | 649.01        | 43.78 | 396.70                   | 16.70 |

| <b>Fig 6D data: Tumor signal/noise ratio (S/N (T<sub>2</sub>*-w)), n = 10 per group</b>                                                                                                |             |              |              |                |                 |
|----------------------------------------------------------------------------------------------------------------------------------------------------------------------------------------|-------------|--------------|--------------|----------------|-----------------|
| Mouse number                                                                                                                                                                           | Vehicle-pre | Vehicle-post | Mouse number | GSK2849330-pre | GSK2849330-post |
| 1                                                                                                                                                                                      | 53.52       | 31.02        | 13           | 47.60          | 36.27           |
| 36                                                                                                                                                                                     | 58.80       | 53.65        | 29           | 60.83          | 44.92           |
| 62                                                                                                                                                                                     | 58.71       | 49.88        | 32           | 58.07          | 41.34           |
| 65                                                                                                                                                                                     | 58.39       | 36.62        | 38           | 54.91          | 42.80           |
| 71                                                                                                                                                                                     | 54.47       | 49.72        | 53           | 50.32          | *               |
| 72                                                                                                                                                                                     | 59.86       | 41.84        | 78           | 56.55          | 39.40           |
| 77                                                                                                                                                                                     | 41.60       | 50.98        | 79           | 49.27          | 45.04           |
| 82                                                                                                                                                                                     | 53.27       | 57.29        | 93           | 47.41          | 38.38           |
| 100                                                                                                                                                                                    | 51.20       | 53.38        | 95           | 39.56          | 24.72           |
| 102                                                                                                                                                                                    | 42.07       | 38.02        | 97           | 40.05          | 43.29           |
| <b>Mean</b>                                                                                                                                                                            | 53.19       | 46.24        | <b>Mean</b>  | 50.47          | 39.57           |
| <b>SEM</b>                                                                                                                                                                             | 2.101       | 2.762        | <b>SEM</b>   | 2.551          | 2.104           |
| * Mouse 53 was excluded from the MRI analysis in the GSK2849330 treated group due to a high concentration of iron and very dark MR signal in the tumor which made analysis impossible. |             |              |              |                |                 |
