# Supplementary material for: Non invasive imaging assessment of the biodistribution of GSK2849330, an ADCC and CDC optimized anti HER3 mAb, and its role in tumor macrophage recruitment in human tumor-bearing mice
Source: PubMed Central journal article supplement (PMC5407619; doi:10.1371/journal.pone.0176075), 2017-04-27
Supplement: pone.0176075.s005.pdf [file pone.0176075.s005.pdf]

S5 Table

| <b>Fig 7D &amp; 7E data: Immunohistochemistry analysis of tumors, n = 10 per group</b> |                                                    |                                               |                                 |                                                    |                                               |
|----------------------------------------------------------------------------------------|----------------------------------------------------|-----------------------------------------------|---------------------------------|----------------------------------------------------|-----------------------------------------------|
| <b>Vehicle group</b>                                                                   |                                                    |                                               | <b>GSK2849330 treated group</b> |                                                    |                                               |
| <b>Mouse number</b>                                                                    | <b>F4/80+ve macrophages (cells/mm<sup>2</sup>)</b> | <b>Double staining (Cells/mm<sup>2</sup>)</b> | <b>Mouse number</b>             | <b>F4/80+ve macrophages (cells/mm<sup>2</sup>)</b> | <b>Double staining (Cells/mm<sup>2</sup>)</b> |
| <b>1</b>                                                                               | 44.88                                              | 15.61                                         | <b>13</b>                       | 181.46                                             | 31.23                                         |
| <b>36</b>                                                                              | 53.84                                              | 5.66                                          | <b>29</b>                       | 99.76                                              | 16.55                                         |
| <b>62</b>                                                                              | 33.73                                              | 4.90                                          | <b>32</b>                       | 111.66                                             | 15.35                                         |
| <b>65</b>                                                                              | 83.43                                              | 18.20                                         | <b>38</b>                       | 186.77                                             | 23.62                                         |
| <b>71</b>                                                                              | 64.71                                              | 15.52                                         | <b>53</b>                       | 175.95                                             | 131.36                                        |
| <b>72</b>                                                                              | 45.31                                              | 7.49                                          | <b>78</b>                       | 101.56                                             | 14.13                                         |
| <b>77</b>                                                                              | 65.69                                              | 11.34                                         | <b>79</b>                       | 139.71                                             | 13.03                                         |
| <b>82</b>                                                                              | 73.02                                              | 18.88                                         | <b>93</b>                       | 267.30                                             | 46.43                                         |
| <b>100</b>                                                                             | 67.58                                              | 12.48                                         | <b>95</b>                       | 190.04                                             | 53.95                                         |
| <b>102</b>                                                                             | 127.61                                             | 45.34                                         | <b>97</b>                       | 115.09                                             | 26.75                                         |
| <b>Mean</b>                                                                            | 65.98                                              | 15.54                                         | <b>Mean</b>                     | 156.93                                             | 37.24                                         |
| <b>SEM</b>                                                                             | 8.31                                               | 3.67                                          | <b>SEM</b>                      | 16.85                                              | 11.34                                         |
